# Supplementary material for: Dextran-Coated Latex Nanoparticles via Photo-RAFT Mediated Polymerization Induced Self-Assembly
Source: MDPI journal article supplement (doi:10.3390/polym13234064), 2021-11-23
Supplement: s1 [file s1]

## Dextran Coated Latex Nanoparticles *via* Photo-RAFT mediated Polymerization Induced Self-Assembly

Valeria Lizeth Romero Castro<sup>1</sup>, Brahim Nomeir<sup>1</sup>, Ana Andreea Arteni<sup>2</sup>, Malika Ouldali<sup>2</sup>, Jean-Luc Six,<sup>1</sup> And Khalid Ferji<sup>1,\*</sup>

<sup>1</sup> Université de Lorraine, CNRS, LCPM, F-54000 Nancy, France 1 ; khalid.ferji@univ-lorraine.fr; jean-luc.six@univ-lorraine.fr; valeromeroC@hotmail.com; brahim.nomeir10@gmail.com.

<sup>2</sup> Institute for Integrative Biology of the Cell (I2BC), Cryo-electron Microscopy Facility, Université Paris-Saclay, CEA, CNRS; ana-andreea.arteni@i2bc.paris-saclay.fr; malika.ouldali@i2bc.paris-saclay.fr.

\* Correspondence: khalid.ferji@univ-lorraine.fr; Tel.: +33-(0)372743691

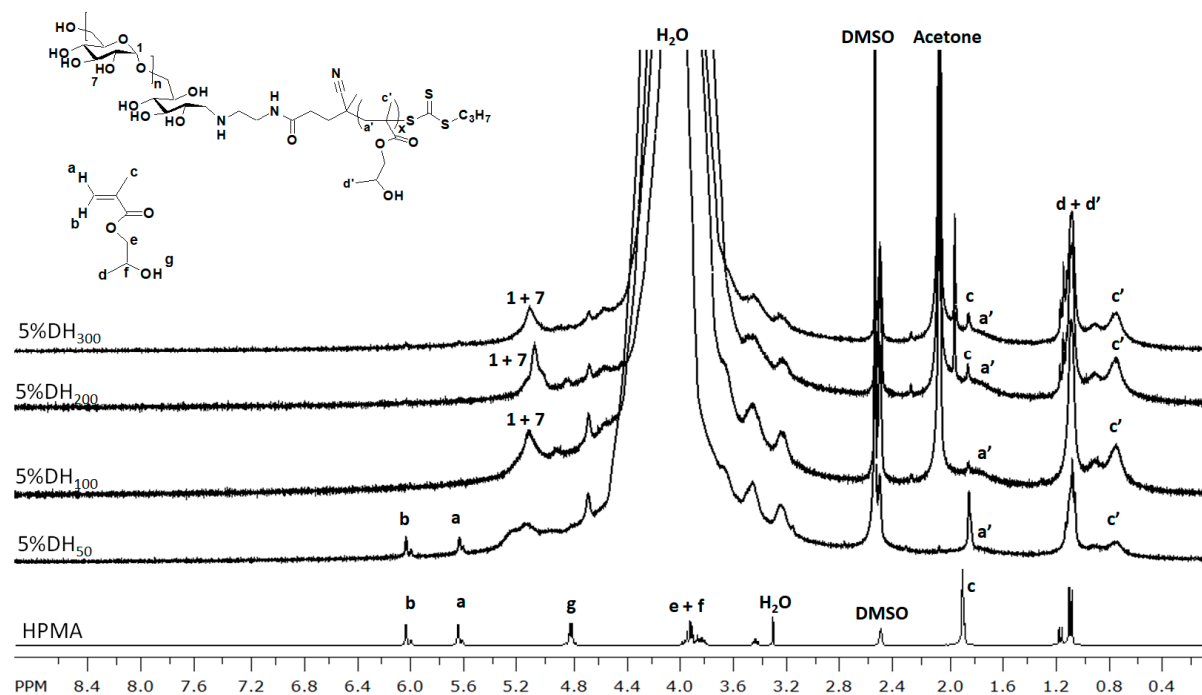

**Figure S1.** <sup>1</sup>H NMR spectra in DMSO-d<sub>6</sub> of HPMA and crude suspensions of dextran-*b*-PHPMA<sub>X=50-300</sub> prepared via photo-RAFT PISA at 5% solid concentration.

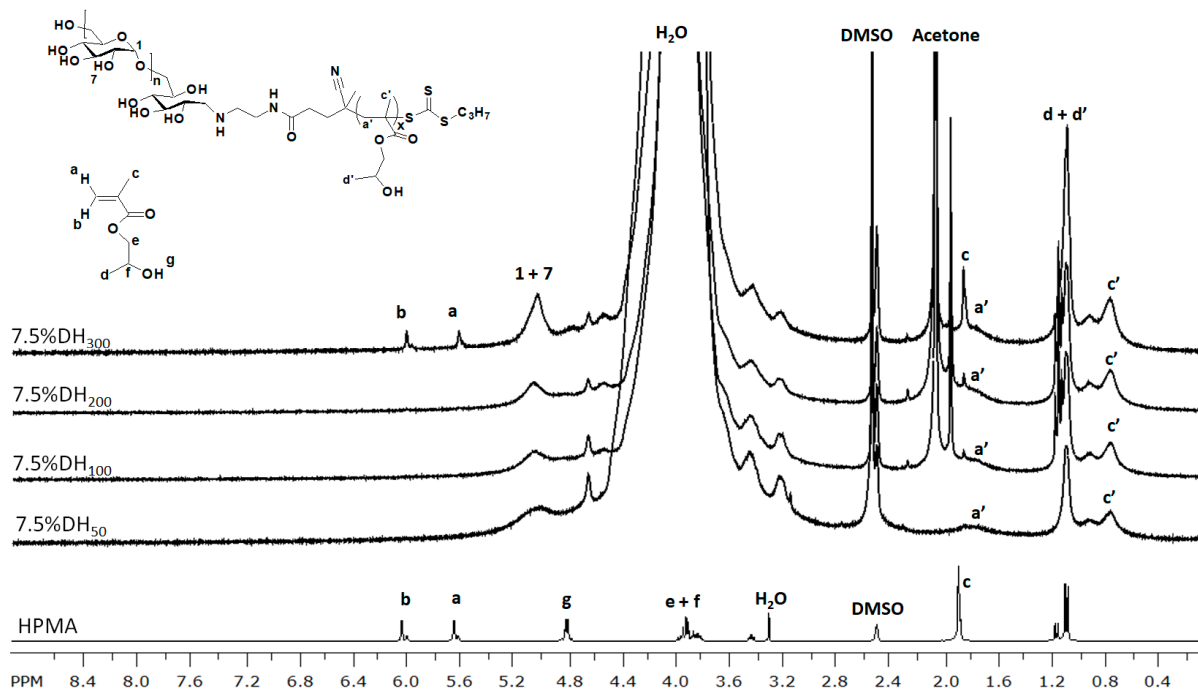

**Figure S2.**  $^1\text{H}$  NMR spectra in  $\text{DMSO-d}_6$  of HPMA and crude suspensions of dextran-*b*-PHPMA<sub>X=50-300</sub> prepared via photo-RAFT PISA at 7.5% solid concentration.

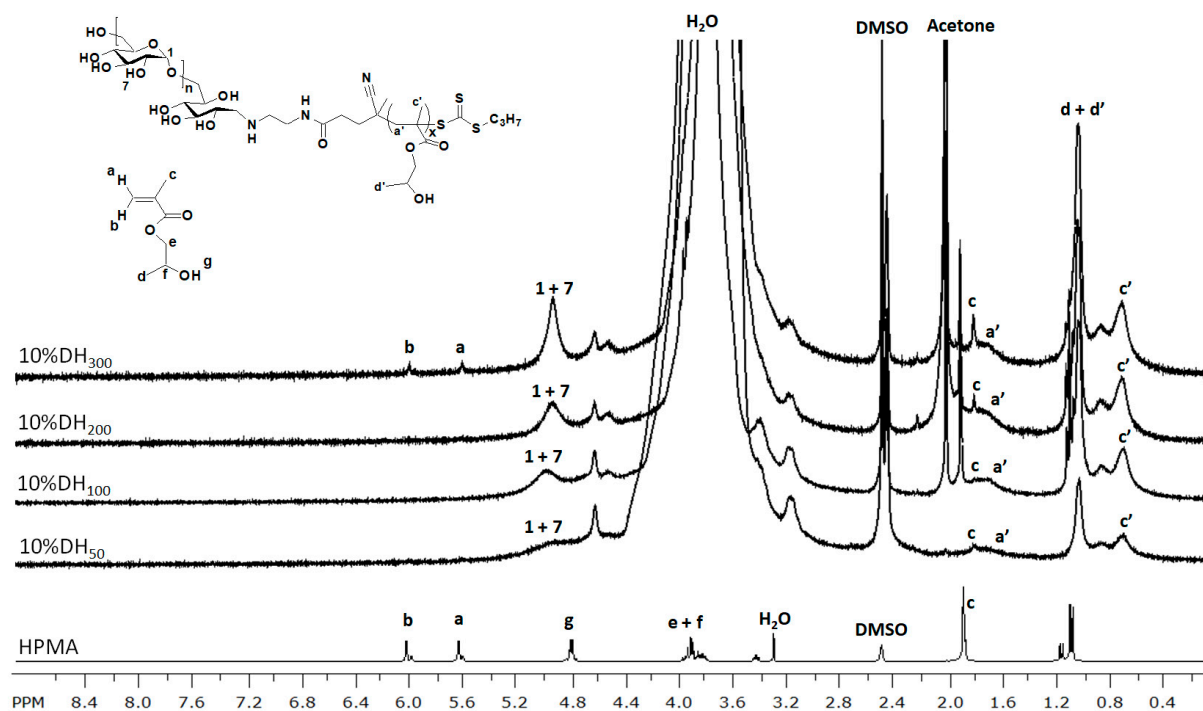

**Figure S3.**  $^1\text{H}$  NMR spectra in  $\text{DMSO-d}_6$  of HPMA and crude suspensions of dextran-*b*-PHPMA<sub>X=50-300</sub> prepared via photo-RAFT PISA at 10% solid concentration.

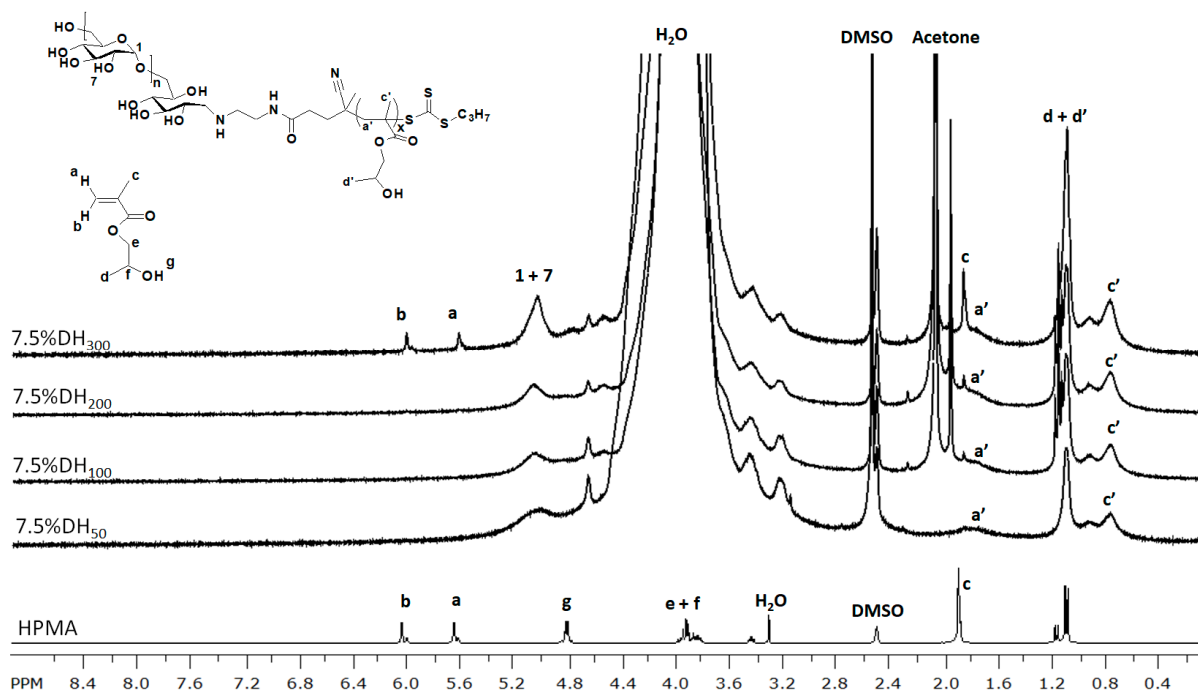

**Figure S4.**  $^1\text{H}$  NMR spectra in DMSO- $d_6$  of HPMA and crude suspensions of dextran-*b*-PHPMA<sub>X=50-300</sub> prepared via photo-RAFT PISA at 12.5% solid concentration.

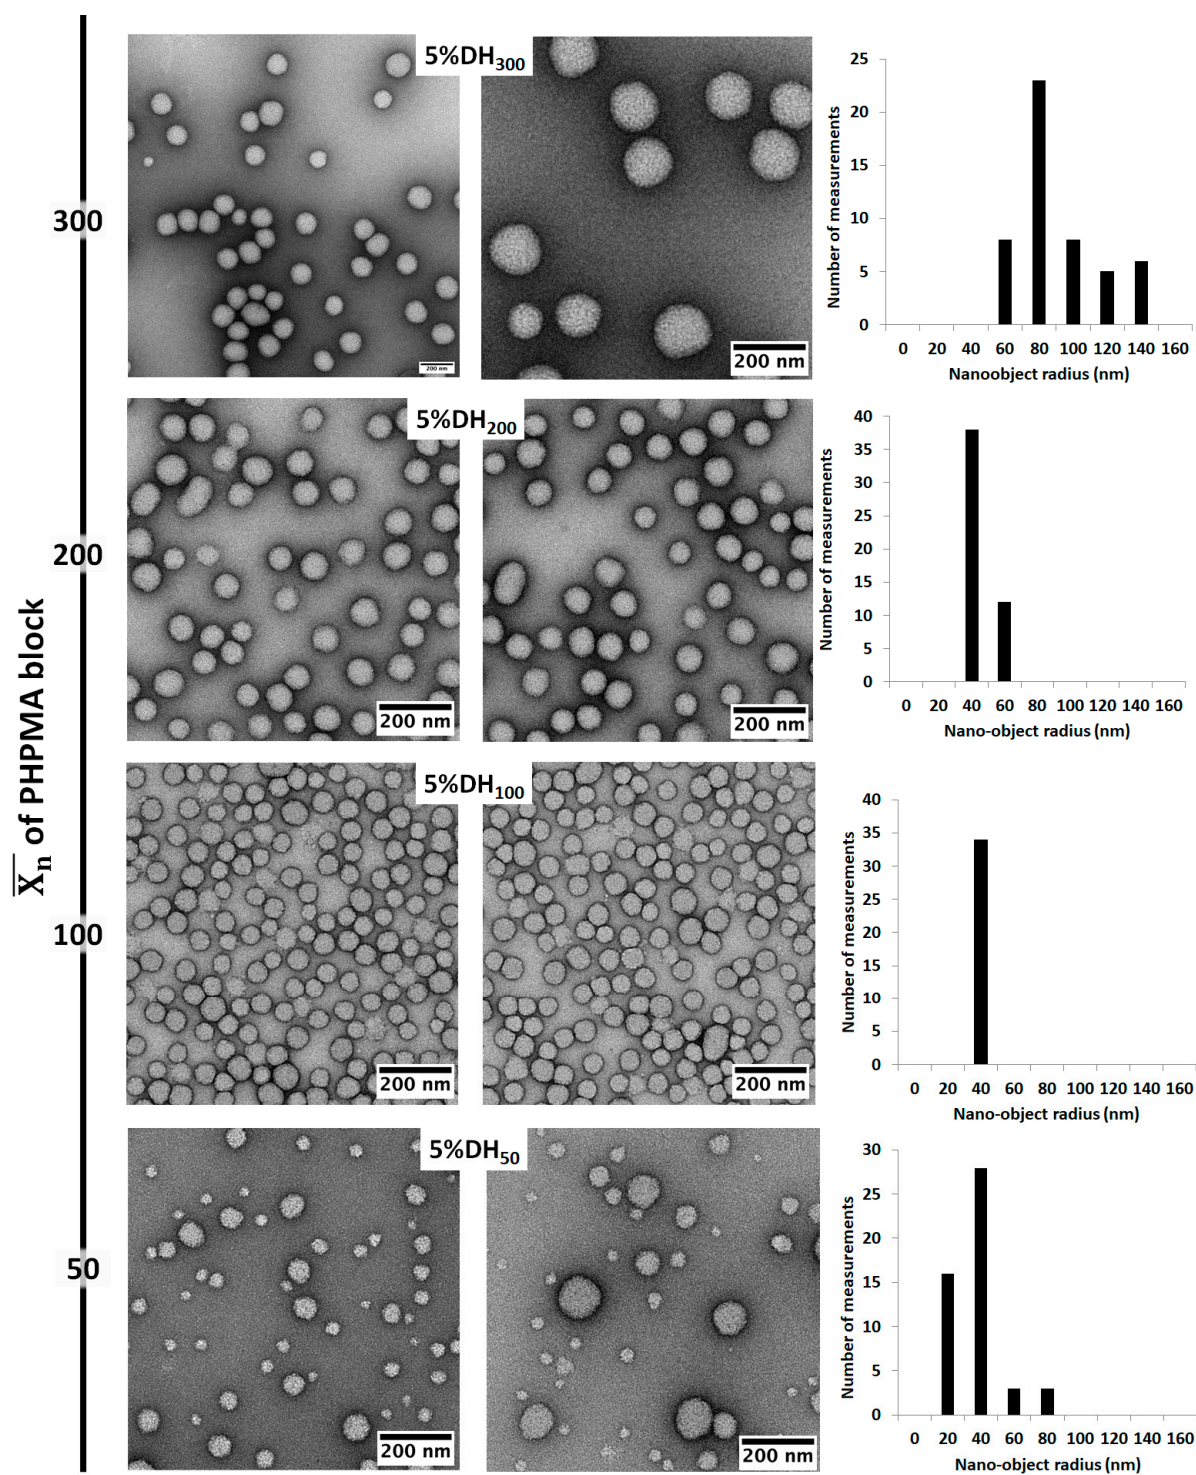

**Figure S5.** TEM images of dextran-*b*-PHPMA<sub>X=50-300</sub> based nano-objects prepared via photo-RAFT PISA at 5% solid concentration. The panels on the right are the statistical analysis of the radii measured for 50 nano-objects using ImageJ software.



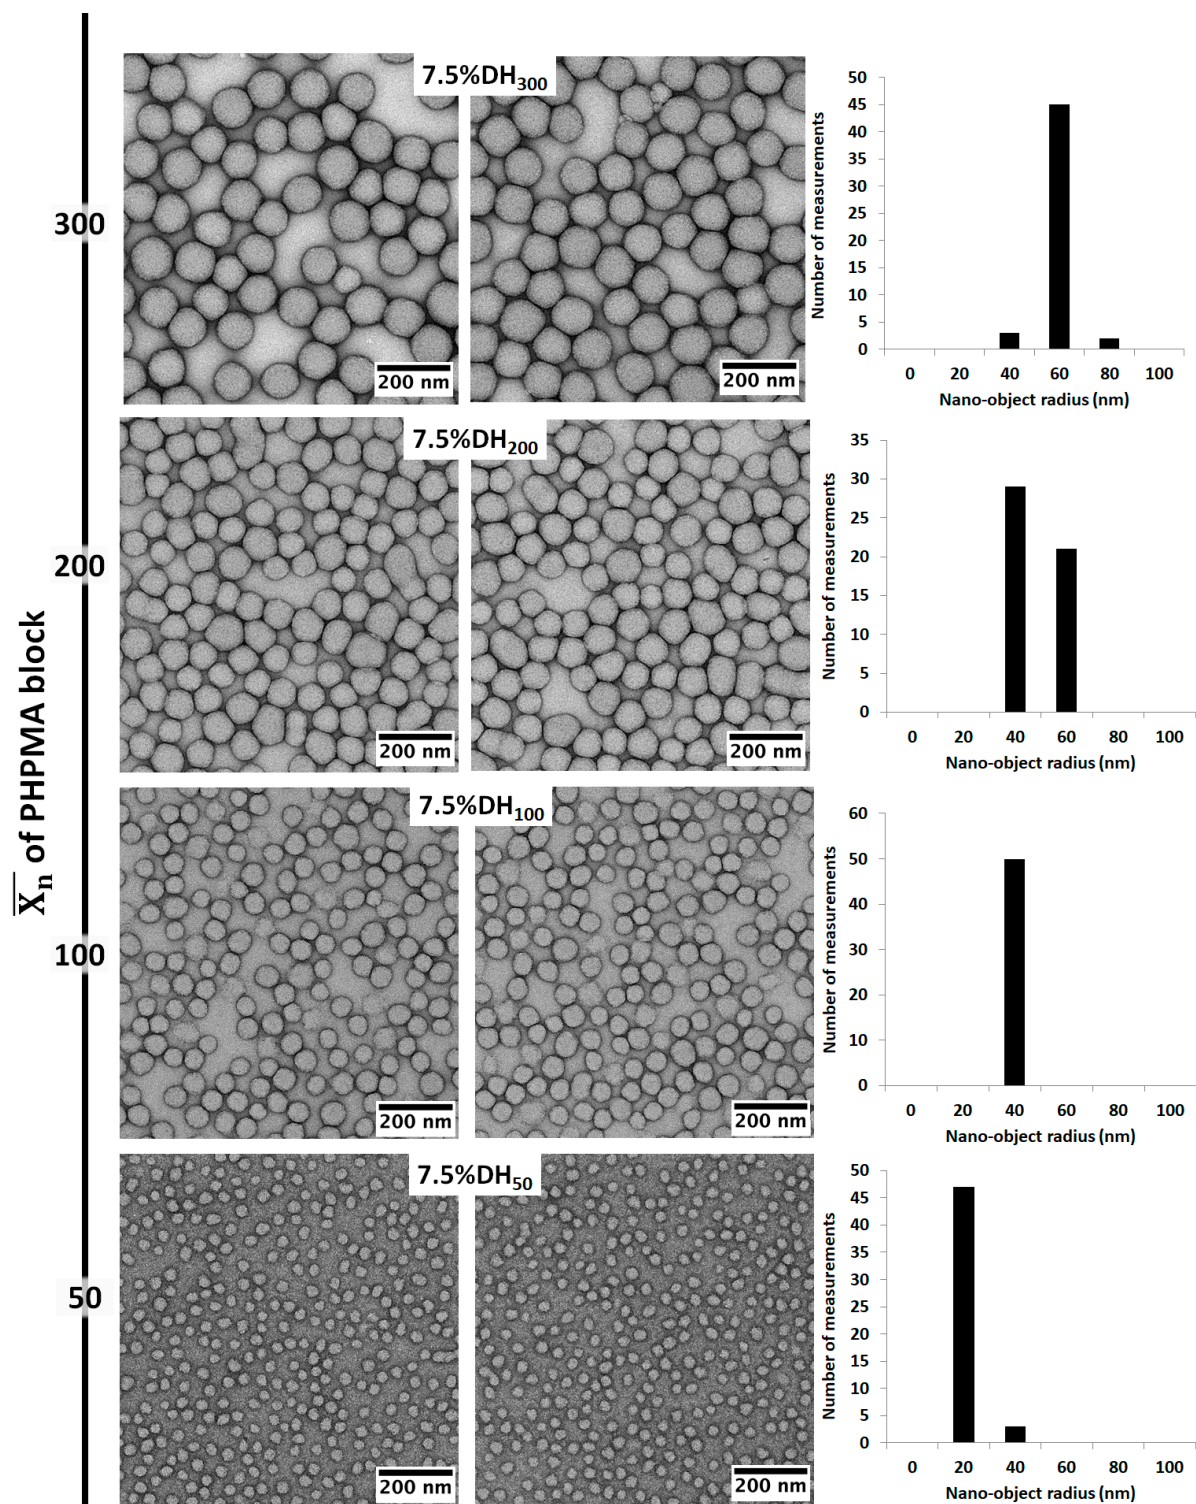

**Figure S6.** TEM images of dextran-*b*-PHPMA<sub>x=50-300</sub> based nano-objects prepared via photo-RAFT PISA at 7.5% solid concentration. The panels on the right are the statistical analysis of the radii measured for 50 nano-objects using ImageJ software.

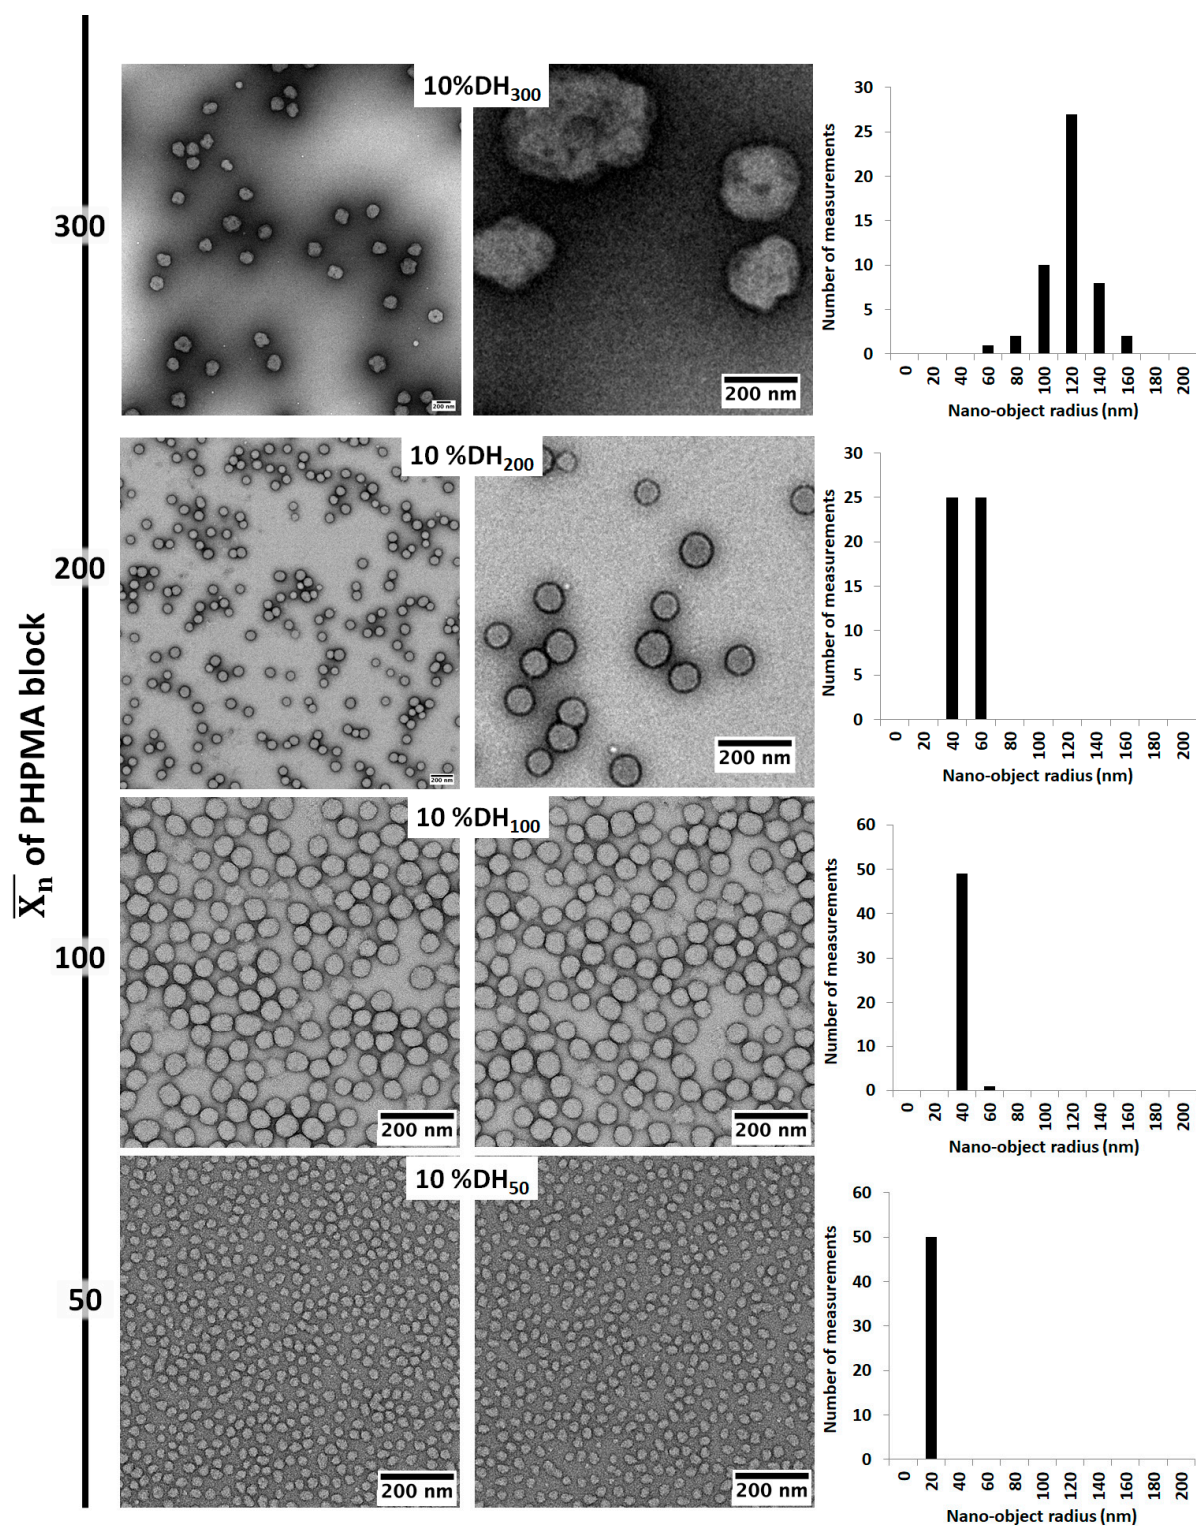

**Figure S7.** TEM images of dextran-*b*-PHPMA<sub>X=50-300</sub> based nano-objects prepared via photo-RAFT PISA at 10% solid concentration. The panels on the right are the statistical analysis of the radii measured for 50 nano-objects using ImageJ software.



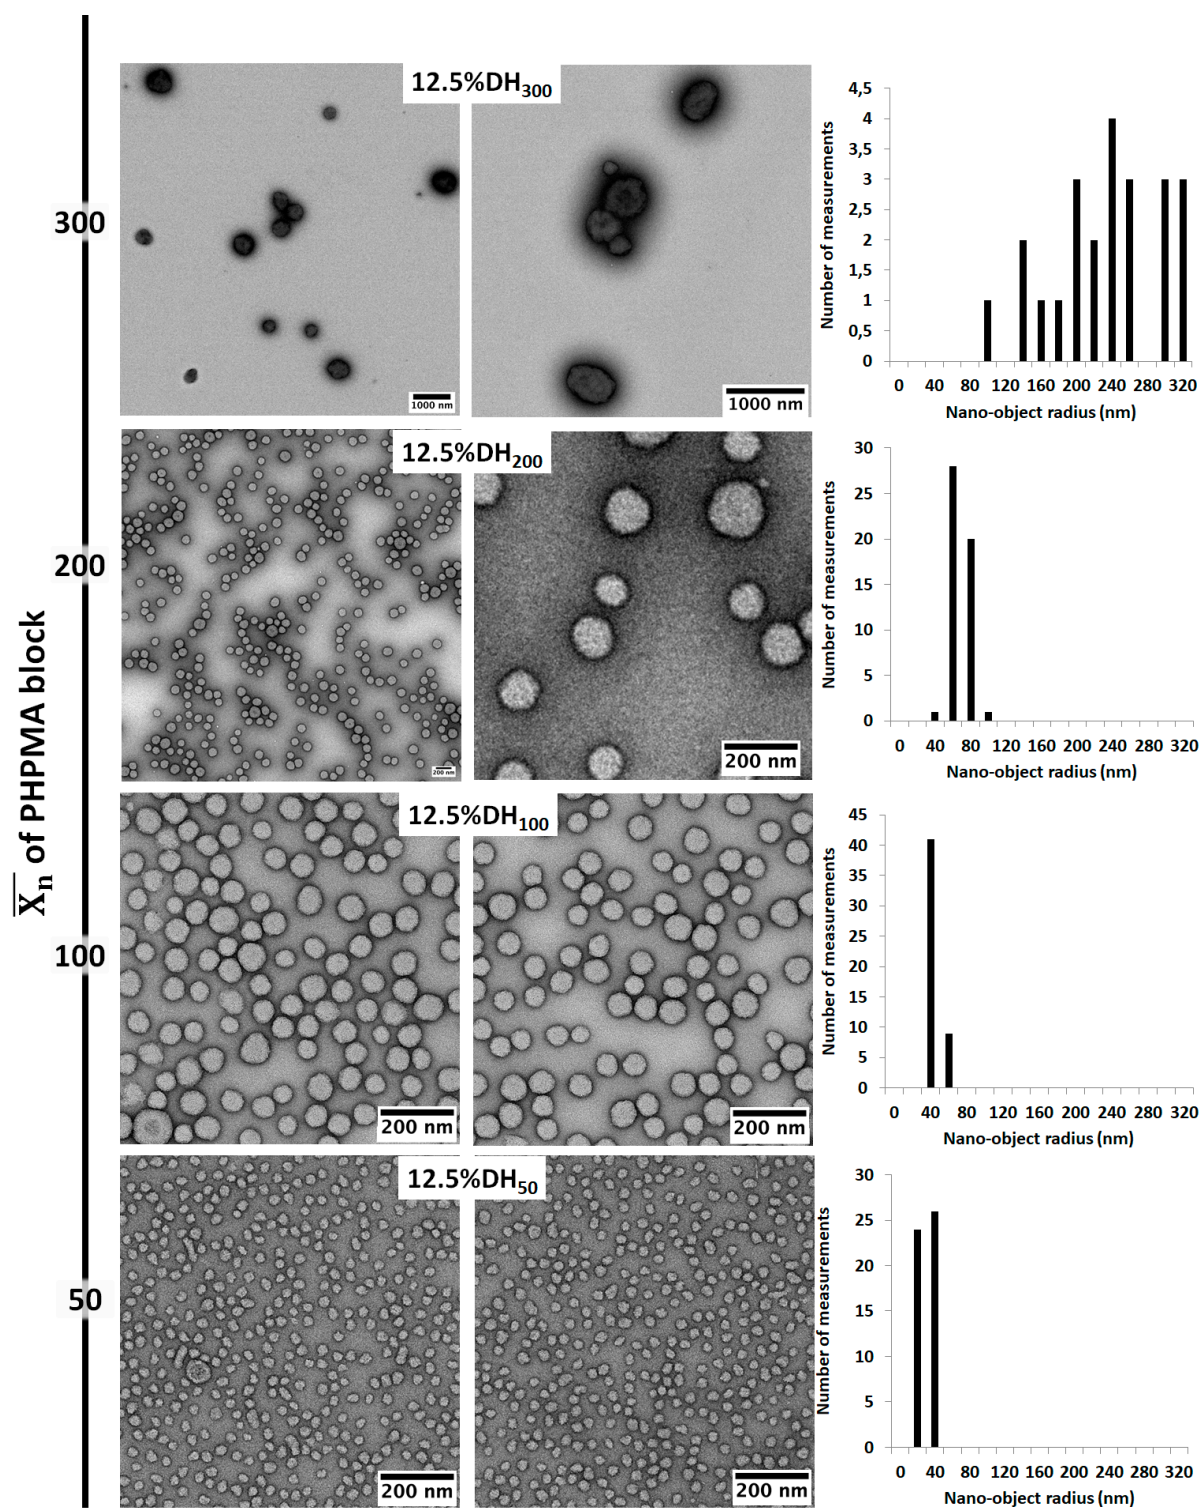

**Figure S8.** TEM images of dextran-*b*-PHPMA<sub>X=50-300</sub> based nano-objects prepared via photo-RAFT PISA at 12.5% solid concentration. The panels on the right are the statistical analysis of the radii measured for 50 nano-objects using ImageJ software.
